# Supplementary material for: Association between Metabolic Phenotypes of Body Fatness and Incident Stroke: A Prospective Cohort Study of Chinese Community Residents
Source: MDPI journal article supplement (doi:10.3390/nu14245258), 2022-12-09
Supplement: s1 [file s1]

Supplementary Materials

# Association between Metabolic Phenotypes of Body Fatness and Incident Stroke: A Prospective Cohort Study of Chinese Community Residents

Minhua Tang <sup>1,2</sup>, Qi Zhao <sup>1</sup>, Kangqi Yi <sup>1</sup>, Yiling Wu <sup>2</sup>, Yu Xiang <sup>1</sup>, Maryam Zaid <sup>1</sup>, Shuheng Cui <sup>1</sup>, Xuyan Su <sup>2</sup>, Yuting Yu <sup>1</sup>, Genming Zhao <sup>1,\*</sup> and Yonggen Jiang <sup>2,\*</sup>

**Table S1.** Characteristics of the study participants according to WC.

| Characteristic                 | All subjects          | WC                                                         |                                                               | <i>p</i> Value |
|--------------------------------|-----------------------|------------------------------------------------------------|---------------------------------------------------------------|----------------|
|                                |                       | Normal<br>(WC < 90 cm for men<br>and < 80 cm for<br>women) | Oversized<br>(WC ≥ 90 cm for men<br>and ≥ 80 cm for<br>women) |                |
| N                              | 34,294                | 20,289 (59.16)                                             | 14,005 (40.84)                                                |                |
| Age (years)                    | 56.05 ± 11.26         | 54.26 ± 11.82                                              | 58.63 ± 9.84                                                  | < 0.001        |
| Male (%)                       | 13,844 (40.37)        | 9869 (48.64)                                               | 3975 (28.38)                                                  | < 0.001        |
| Education degree (%)           |                       |                                                            |                                                               |                |
| ≤ 6 years                      | 4871 (14.20)          | 2031 (10.01)                                               | 2840 (20.28)                                                  | < 0.001        |
| 7–12 years                     | 26,314 (76.73)        | 15,827 (78.01)                                             | 10,487 (74.88)                                                |                |
| ≥ 13 years                     | 3109 (9.07)           | 2431 (11.98)                                               | 678 (4.84)                                                    |                |
| Marital status (%)             |                       |                                                            |                                                               |                |
| Married                        | 31,883 (92.97)        | 18,941 (93.36)                                             | 12,942 (92.41)                                                | < 0.001        |
| Other <sup>a</sup>             | 2411 (7.03)           | 1348 (6.64)                                                | 1063 (7.59)                                                   |                |
| Retired (%)                    | 19,783 (57.69)        | 10379 (51.16)                                              | 9404 (67.15)                                                  | < 0.001        |
| Place of residence             |                       |                                                            |                                                               |                |
| Non-urban                      | 19,658 (57.32)        | 11,158 (55.0)                                              | 8500 (60.69)                                                  | < 0.001        |
| Urban                          | 14,636 (42.68)        | 9131 (45.0)                                                | 5505 (39.31)                                                  |                |
| Smoking index, packet year (%) |                       |                                                            |                                                               |                |
| None-smoker                    | 26,242 (76.52)        | 14,556 (71.74)                                             | 11,686 (83.44)                                                | < 0.001        |
| < 20.0                         | 2241 (6.53)           | 1652 (8.14)                                                | 589 (4.21)                                                    |                |
| 20.0–39.9                      | 3160 (9.21)           | 2227 (10.98)                                               | 933 (6.66)                                                    |                |
| ≥ 40                           | 2651 (7.73)           | 1854 (9.14)                                                | 797 (5.69)                                                    |                |
| Alcohol drinking (%)           |                       |                                                            |                                                               |                |
| Never                          | 29,672 (86.52)        | 17,146 (84.51)                                             | 12,526 (89.44)                                                | < 0.001        |
| Former                         | 359 (1.05)            | 225 (1.11)                                                 | 134 (0.96)                                                    |                |
| Current                        | 4263 (12.43)          | 2918 (14.38)                                               | 1345 (9.60)                                                   |                |
| Physical activities (%)        |                       |                                                            |                                                               |                |
| Low                            | 10,593 (30.89)        | 7034 (34.67)                                               | 3559 (25.41)                                                  | < 0.001        |
| Moderate                       | 21,084 (61.48)        | 11,941 (58.85)                                             | 9143 (65.28)                                                  |                |
| High                           | 2617 (7.63)           | 1314 (6.48)                                                | 1303 (9.30)                                                   |                |
| Fruit intake (g/d)             | 57.14 (28.57–120.0)   | 71.43 (28.57–142.86)                                       | 57.14 (28.57–100.0)                                           | < 0.001        |
| Vegetable intake (g/d)         | 242.85 (128.57–400.0) | 242.86 (128.58–403.29)                                     | 235.15 (120.87–371.43)                                        | < 0.001        |
| Fish intake (g/d)              | 41.97 (20.87–64.29)   | 42.87 (22.19–71.43)                                        | 41.72 (19.74–63.72)                                           | < 0.001        |
| Unprocessed meat intake (g/d)  | 44.50 (27.89–72.44)   | 46.81 (29.09–78.01)                                        | 42.55 (24.16–68.24)                                           | < 0.001        |
| Processed meat intake (%)      |                       |                                                            |                                                               |                |

|                                   |                  |                  |                  |         |
|-----------------------------------|------------------|------------------|------------------|---------|
| Never                             | 17,574 (51.25)   | 10,337 (50.95)   | 7237 (51.67)     | 0.104   |
| 1–3 times/month                   | 13,874 (40.46)   | 8216 (40.49)     | 5658 (40.40)     |         |
| 1–3 times/week                    | 2716 (7.92)      | 1663 (8.20)      | 1053 (7.52)      |         |
| 4–7 times/week                    | 130 (0.38)       | 73 (0.36)        | 57 (0.41)        |         |
| BMI (kg/m <sup>2</sup> )          | 24.38 ± 3.35     | 22.77 ± 2.55     | 26.71 ± 2.96     | < 0.001 |
| WC (cm)                           | 81.62 ± 9.42     | 76.28 ± 7.0      | 89.36 ± 6.72     | < 0.001 |
| SBP (mmHg)                        | 133.41 ± 19.38   | 129.79 ± 18.89   | 138.66 ± 18.87   | < 0.001 |
| DBP (mmHg)                        | 79.99 ± 10.51    | 78.81 ± 10.50    | 81.71 ± 10.29    | < 0.001 |
| Anti-hypertensive medications (%) | 10,863 (31.68)   | 4947 (24.38)     | 5919 (42.24)     | < 0.001 |
| TG (mmol/L)                       | 1.34 (0.98–1.92) | 1.22 (0.90–1.71) | 1.55 (1.14–2.19) | < 0.001 |
| HDL-C (mmol/L)                    | 1.41 ± 0.36      | 1.45 ± 0.36      | 1.35 ± 0.35      | < 0.001 |
| LDL-C (mmol/L)                    | 2.78 ± 0.83      | 2.73 ± 0.80      | 2.86 ± 0.87      | < 0.001 |
| Statins (%)                       | 2547 (7.43)      | 968 (4.77)       | 1579 (11.27)     | < 0.001 |
| FPG (mmol/L)                      | 4.72 (4.26–5.37) | 4.69 (4.25–5.26) | 4.79 (4.27–5.57) | < 0.001 |
| HbA1c (%)                         | 5.6 (5.3–6.0)    | 5.6 (5.3–5.9)    | 5.8 (5.4–6.15)   | < 0.001 |
| Metabolic status (%)              |                  |                  |                  |         |
| Metabolically healthy             | 18,759 (54.70)   | 13,160 (64.86)   | 5599 (39.98)     | < 0.001 |
| Metabolically unhealthy           | 15,535 (45.30)   | 7129 (35.14)     | 8406 (60.02)     |         |
| Number of metabolic abnormalities | 1.50 ± 1.12      | 1.23 ± 1.04      | 1.88 ± 1.10      | < 0.001 |

<sup>a</sup>Other included unmarried, divorced, separated, and widowed. WC, waist circumference; SBP, systolic blood pressure; DBP, diastolic blood pressure; TG, triglyceride; LDL-C, low-density lipoprotein cholesterol; HDL-C, high-density lipoprotein cholesterol; FPG, fasting plasma glucose; HbA1c, glycated hemoglobin.
